# Supplementary material for: Control of the Cu morphology on Ru-passivated and Ru-doped TaN surfaces – promoting growth of 2D conducting copper for CMOS interconnects
Source: Royal Society of Chemistry journal article supplement (doi:10.1039/d1sc04708f), 2021-12-13
Supplement: d1sc04708f1.pdf [file d1sc04708f1.pdf]

1. Movie files are uploaded to the submission system. Text added on page 7: *Movie files (animated gifs) of AIMD runs at 500 K for TaN, IML-Ru on TaN, 50% Ru-TaN and 100% Ru-TaN have been provided.*
  - a. These movies are available at this link:  
<https://drive.google.com/drive/folders/12qOVV1KSPBgKNUcdg-eq64iA9LDmMYhR?usp=sharing>
